# Supplementary material for: Relating Period and Cohort Fertility
Source: Oxford University Press journal article supplement (doi:10.1215/00703370-9936991), 2022-04-25
Supplement: schoen_esm.pdf [file schoen_esm.pdf]

Relating Period and Cohort Fertility  
Robert Schoen ([rschoen309@att.net](mailto:rschoen309@att.net))

**APPENDIX**

A. Derivation of Eq(7) [Linear fertility trajectory]

$$\begin{aligned}
 A_c(T) &= \int x \text{TFR}(T+x) c(x) dx / \text{CFR}(T) \\
 &= \int x [R + a(T+x)] c(x) dx / \text{CFR}(T) = \int \{x [R + aT]c(x) + ax^2 c(x)\} dx / \text{CFR}(T) \\
 &= \{(R+aT) [\int x c(x) dx] + a \int x^2 c(x) dx\} / \text{CFR}(T) \tag{A.1}
 \end{aligned}$$

with all integrals ranging over ages 15 to 45. The final equality expresses the cohort mean age of fertility as a function of the first and second moments of proportional fertility schedule  $c(x)$ . The first moment is the mean, denoted  $\mu$ , equals  $\int x c(x) dx$ . The second moment about the mean is the variance (Var). Specifically,

$$\begin{aligned}
 \text{Var} &= \int (x-\mu)^2 c(x) dx \\
 &= \int x^2 c(x) dx - 2\mu \int x c(x) dx + \mu^2 \\
 &= \int x^2 c(x) dx - \mu^2 \tag{A.2}
 \end{aligned}$$

Rewriting Eq(A.2),

$$\int x^2 c(x) dx = \text{Var} + \mu^2 \tag{A.3}$$

Substituting Eq(A.3) into Eq(A.1) using Eq(5) yields

$$\begin{aligned}
 A_c(t) &= [(R+aT)\mu + a(\text{Var}+\mu^2)] / \text{CFR}(T) = \{[R+a(T+\mu)]\mu + a\text{Var}\} / \text{TFR}(T+\mu) \\
 &= \mu + a\text{Var}/\text{CFT}(T) \tag{A.4}
 \end{aligned}$$

B. Derivation of Eqs(12)-(13) [Quadratic fertility trajectory]

The derivation essentially follows from integrating the quadratic TFR function over the reproductive years, ages 15 to 45. Thus, using Eq(A.3)

$$\begin{aligned}
 \text{CFR}(T) &= \int [R + a(T+x) + b(T+x)^2] c(x) dx = (R+aT+bT^2) + \mu(a+2bT) + b \int x^2 c(x)dx \\
 &= \text{TFR}(T) + 2bT\mu + a\mu + b\mu^2 + b \text{Var} \\
 &= \text{TFR}(T+\mu) + b \text{Var} \tag{A.5}
 \end{aligned}$$

For the quadratic mean age, the third moment about the mean, i.e. the skew, is needed. Here, we assume that the fertility function is symmetric (e.g. a normal curve or the parabola of Eq(6)), and write the definition of the skew, with its value set to zero, as

$$0 = \int (x-\mu)^3 c(x)dx = \int x^3 c(x)dx - \int 3\mu x^2 c(x)dx + \int 3\mu^2 x c(x)dx - \int \mu^3 c(x)dx \quad (\text{A.6})$$

Rewriting (A.6) to find the third moment,

$$\int x^3 c(x) dx = 3\mu[\text{Var}+\mu^2] - 3\mu^3 + \mu^3 = 3\mu\text{Var} + \mu^3 \quad (\text{A.7})$$

Integrating for the quadratic cohort mean age of fertility, using Eqs(A.5) and (A.7)

$$\begin{aligned} A_c(T) &= \int x [R + a(T+x) + b(T+x)^2] c(x) dx / \text{CFR}(T) \quad (\text{A.8}) \\ &= \{ \mu[R+aT+bT^2] + (a+2bT)[\text{Var}+\mu^2] + b[3\mu\text{Var} + \mu^3] \} / \text{CFR}(T) \\ &= \{ \mu \text{TFR}(T) + \mu^2(a+2bT) + b\mu^3 + b\mu\text{Var} + \text{Var}[a+2bT+3b\mu-b\mu] \} / \text{CFR}(T) \\ &= \{ \mu \text{CFR}(T) + \text{Var}(a+2bT+2b\mu) \} / \text{CFR}(T) = \mu + \text{Var}[a+2b(T+\mu)] / \text{CFR}(T) \end{aligned}$$

### C. Derivation of Eqs(15) and (16) [Cubic fertility trajectory]

With a cubic fertility trajectory, Eq(14) implies that

$$\begin{aligned} \text{TFR}(T+\mu) &= R + a(T+\mu) + b(T^2 + 2T\mu + \mu^2) + d(T^3 + 3T^2\mu + 3T\mu^2 + \mu^3) \\ &= \text{TFR}(T) + \mu(a+2bT+3dT^2) + \mu^2(b+3dT) + d\mu^3 \quad (\text{A.9}) \end{aligned}$$

Again assuming a zero skew, the cohort fertility rate can be found by integrating Eq(14) using Eqs(A.4), (A.7), and (A.9). Thus

$$\begin{aligned} \text{CFR}(T) &= \int c(x) [R + aT + ax + bT^2 + 2bTx + bx^2 + dT^3 + 3dT^2x + 3dT x^2 + dx^3] dx \\ &= \text{TFR}(T) + (a+2bT+3dT^2) \mu + [b+3dT] (\mu^2 + \text{Var}) + d (3\mu\text{Var} + \mu^3) \\ &= \text{TFR}(T+\mu) + \text{Var}[b + 3d(T+\mu)] \quad (\text{A.10}) \end{aligned}$$

For the cubic cohort mean age, we need to know the fourth moment about the mean, i.e. the kurtosis. Assume that  $c(x)$  has zero skew and the kurtosis of a normal curve. From Kendall and Stuart (1958, Vol 1, p67-74) and Keyfitz (1977, Chap. 5), we can write

$$\int x^4 c(x) dx = 3 \text{Var}^2 + 6\mu^2 \text{Var} + \mu^4 \quad (\text{A.11})$$

Using Eqs(14), (A.4), (A.7), and (A.9)-(A.11), along with the definition of the CFR in Eq(3),

$$\begin{aligned}
A_c(T) &= \int x c(x) [R+aT+ax+bT^2 +2bTx+bx^2 +dT^3 +3dT^2 x+3dT x^2 +dx^3] dx / CFR(T) \\
&= \{ \mu TFR(T) + (a+2bT+3dT^2)[\mu^2 + Var] + (b+3dT)[3\mu Var+\mu^3] \\
&\quad + d [3Var^2 +6\mu^2 Var+\mu^4] \} / CFR(T) \\
&= \{ \mu TFR(T+\mu) + Var (a+2bT+3dT^2) + 3\mu Var(b+3dT) + d( 3Var^2 +6\mu^2 Var) \} / CFR(T) \\
&= \{ [\mu TFR(T+\mu) + \mu Var(b+3d[\mu+T])] + 2\mu Var(b+3dT) -3d\mu^2 Var + \\
&\quad Var( a+2bT+3dT^2) + 3dVar[2\mu^2 + Var ] \} / CFR(T) \\
&= \{ \mu CFR(T) + 2\mu Var(b+3dT) + Var( a+2b(T+\mu) +3dVar(T+\mu)^2) + Var^2 \} / CFR(T) \\
&= \mu + Var \{ a+2b(T+\mu)+3d [ (T+\mu)^2) + Var] \} / CFR(T) \tag{A.12}
\end{aligned}$$

#### D. Derivation of the parabolic curve in Eq(6)

A simple parabola can capture the essential nature of the fertility curve. With the  $c(x)$  function 0 at ages 15 and 45, and with an area of 1 between those ages, the curve is specified by the equations

$$\begin{aligned}
0 &= w + 15y + (15)^2 z \\
0 &= w + 45y + (45)^2 z \\
1 &= \int (w+yx+zx^2) dx = wx + yx^2/2 + zx^3/3 \tag{A.13}
\end{aligned}$$

where the last equality is evaluated for  $x$  at ages 45 and 15. Solving those equations yields the real solution

$$w = -3/20; \quad y = (1/75); \quad \text{and } z = (-1/4500) \tag{A.14}$$

With total fertility changing linearly,  $R = 1$ , and  $a = 0.02$ , the  $t = 30$  period and  $T = 0$  cohort age curves of fertility are shown in Figure 1. Integrating the fertility function over 5-year intervals yields the 5-year values plotted, i.e.

| <u>Age</u> | <u>Period f(x,5)</u> | <u>Cohort f(x,5)</u> | <u>Δ (Period – Cohort)</u> |
|------------|----------------------|----------------------|----------------------------|
| 15-19      | .118519              | .101157              | .017362                    |
| 20-24      | .296296              | .269213              | .027083                    |
| 25-29      | .385185              | .373380              | .011805                    |
| 30-34      | .385185              | .396990              | – .011805                  |
| 35-39      | .296296              | .323379              | – .027083                  |
| 40-44      | .118519              | .135881              | – .017362                  |

The symmetry about age 30 of the period/cohort differences is apparent.

### E. Derivation of Eq(19) for the Average Cohort Fertility

With the constant  $c(x)$  of Eq(6) and the cubic trajectory of Eq(14), Eq(18) leads to

$$\begin{aligned} \text{ACF}(t) &= \int \{ \text{TFR}(t+\mu-x) + \text{Var}[b+3d(t+\mu-x)] \} c(x) dx \\ &= R + \int a(t+\mu-x) c(x)dx + \int b(t+\mu-x)^2 c(x)dx + \int d(t+\mu-x)^3 c(x)dx + \text{Var}[b+3dt] \quad (\text{A.15}) \end{aligned}$$

where the integrals range over ages 15 to 45. Using Eqs(A.4), (A.7) and (A.9),

$$\begin{aligned} \text{ACF}(t) &= R + at + b(t+\mu)^2 - 2b(t+\mu)\mu + b(\text{Var}+\mu^2) + d(t+\mu)^3 - 3d(t+\mu)^2 \mu + 3d(t+\mu)(\text{Var}+\mu^2) \\ &\quad - d[3\mu\text{Var}+\mu^3] + \text{Var}(b+3dt) \\ &= R + at + bt^2 + dt^3 + \text{Var}(2b+6dt) = \text{TFR}(t) + 2\text{Var}(b+3dt) \quad (\text{A.16}) \end{aligned}$$

From Eq(15) it follows that

$$\text{ACF}(t) = \text{CFR}(T) + \text{Var}(b+3dt) \quad (\text{A.17})$$

### F. Sources for United States Fertility Data, 1917 – 2019

For over 45 years, the U.S. National Center for Health Statistics has assembled and published a sizeable amount of data on both period and cohort fertility. The foundational effort was the Heuser (1976) volume *Fertility Tables for Birth Cohorts by Color: United States 1917-1973*, which was the source used for those years. Birth rates by age of mother for the years 1970-2015 are provided by Martin et al (2017), the years 2016-2018 by Martin et al (2019), and the year 2019 from Hamilton et al (2020). Another useful source was Hamilton and Kirmeyer (2017).

Cohort total fertility rates, when not published, were calculated from the age-specific birth rates in the above sources, especially Heuser (1976), and from Hamilton and Cosgrove (2010). The experience of cohorts, up to the birth cohort of 1984, was completed using the experience of the year 2019. Actual data were always used through age 35.

Period mean ages of fertility ( $A_p$ ) for the years 1917 through 2001 were taken from Schoen (2004), and were calculated, for the years 2002-2015 from Martin et al (2017), for the years 2016-2018 from Martin et al (2019), and for the year 2019 from Hamilton et al (2020). The variance of fertility, for the years 1919-1965 was taken from, or linearly interpolated from, data in Keyfitz and Flieger (1968), and for the years 1966-1985 from Keyfitz and Flieger (1990). Variances for years after 1985 were calculated from the published age-specific birth rates for those years.

### G. Calculations to Estimate Cohort Fertility

Five different CFR estimates were calculated, using alternative model specifications. The first alternative simply compared the observed CFR(T) to the corresponding TFR, and is

shown in Figure 3. That assumption of linearity in the TFR is rather crude, and is off by an average of 0.196 children. Using a base CFR value of 2, that is an average error of 9.8%.

The next 2 estimates assume that fertility in an interval around focal year  $t$  follows a cubic curve, and uses the adjustment to TFR shown in Table 1. To fit a cubic curve, the length of the interval of estimation needs to be specified. Less than 20 years seems too short, while more than 30 years would be very data demanding. Intervals of both 20 and 30 years were considered. First, at each time point, the 20-year cubic estimate rescaled time  $t$  to time zero and fit the cubic curve to TFRs for times  $-10$ ,  $-5$ ,  $+5$ , and  $+10$ . The estimated CFR( $T$ ) is then just  $[\text{TFR}(t) + b_{20} \text{Var}]$ , where  $b_{20}$  is the coefficient of the quadratic term in the cubic equation derived from the TFR values of the 20-year fitting interval. Solving for the cubic coefficients  $R$ ,  $a$ ,  $b$ , and  $d$ , using the known TFR values and four equations of the form of Eq(14), yields

$$b_{20} = [\text{TFR}(-10) - \text{TFR}(-5) - \text{TFR}(5) + \text{TFR}(10)] / 150 \quad (\text{A.18})$$

The 30-year estimate fits the cubic curve to TFRs for times  $-15$ ,  $-5$ ,  $+5$ , and  $+15$ . That 30 year interval matches the length of the reproductive age span, and gives the cubic a broader base. The solution for  $b_{30}$  is

$$b_{30} = [\text{TFR}(-15) - \text{TFR}(-5) - \text{TFR}(5) + \text{TFR}(15)] / 400 \quad (\text{A.19})$$

(See **Appendix Supplement 3.**) Quadratic parameters  $b_{20}$  and  $b_{30}$  are both estimated for the cubic curve appropriate to each calendar year. Alternative calculations were made with the fitted TFR values calculated as the arithmetic means of the TFRs for the 5 years centered on the fitted points. Those results were very similar.

The last 2 estimates use those  $b_{20}$  and  $b_{30}$  values but with graduated period TFR values. Weighted moving averages are a classic technique for smoothing a time series to eliminate data perturbations. Even vital statistics data, which are based on a large number of cases, exhibit irregularities. The standard graduation approach minimizes deviations from a cubic curve and uses  $2m+1$  weights applied to the focal year and to values  $m$  years before and after that focal year. The value of  $m$  is generally set at between 3 and 11. Here, with our long time series,  $m$  was set at 10, and the 21-term weighted moving average in Hoem and Linnemann (1988, Table A 2.8) was used to smooth the TFR series and produce the gTFR series. **Appendix Table 1** and **Appendix Supplement 5** provide yearly values for  $b_{20}$ ,  $b_{30}$ , Var, the graduated TFR series, and the errors of estimate.

**Appendix Table 2** shows that estimates from either  $b_{20}$  or  $b_{30}$  work about equally well. The graduated TFR values produce estimates averaging about 0.01 better than the ungraduated TFR values, and substantially reduce the number of large errors. On a base of 2, the graduated TFR series yields estimation errors averaging 7.2%, while the ungraduated TFRs yield errors averaging 7.8% (i.e. 8% larger). Appendix Table 1 shows that estimates for years after 2000 are particularly prone to error, with many differences of 0.20 to 0.24.

The 4 cubic estimated CFR curves are quite similar. Because the ungraduated  $b_{30}$  curve is both easier to calculate and more demographically rooted, it is shown in Figure 3.

## H. Projecting Cohort Fertility

To find the cubic parameters to adjust TFR(t) to approximate CFR(T) using Eq(15), equations of the form of Eq(A.19) are used. The approach proceeds year by year, from 2005 through 2019. For every year, TFR values for the years 1989, 1999, 2009, and 2019 are used, but the focal year, i.e. the year that is considered year 0, changes. Let z be an integer from 1 through 15. Then, for year (2004 + z), that year is considered year zero and the set of equations to be solved for R, a, b, and d is

$$\begin{aligned}
 \text{TFR}(1989) = 2.014 &= R + a(-15-z) + b(-15-z)^2 + d(-15-z)^3 \\
 \text{TFR}(1999) = 2.008 &= R + a(-5-z) + b(-5-z)^2 + d(-5-z)^3 \\
 \text{TFR}(2009) = 2.002 &= R + a(5-z) + b(5-z)^2 + d(5-z)^3 \\
 \text{TFR}(2019) = 1.705 &= R + a(15-z) + b(15-z)^2 + d(15-z)^3
 \end{aligned} \tag{A.20}$$

For example, for the year 2019, z = 15 and the parameter weights are -30, -20, -10, and 0. Thus for the cohort of 1989-90, behavior through 2034-35 is estimated from data through 2019 via a cubic projection.

The results of the calculations are shown in Table 4 of the paper. The Maple calculation program HyperTrans b30Years1989-2019, for the year 2019, is presented in **Appendix Supplement 4**.

The back projections used the same approach, but based the cubic curve on the years 1917, 1927, 1937, and 1947. The results are shown in Table 5 of the paper. Maple calculation program HyperTrans b30Years1917-1947, for the year 1917, is presented in **Appendix Supplement 6**.

## I. Estimating Age-Specific Fertility Proportions for the U. S., 1925, 1950, 1975, and 2000.

For consistency with the assumptions underlying Eq(15) and with conventional demographic practice (e.g. in Keyfitz 1977, Chap. 6), age-specific fertility proportions were estimated using a normal curve parameterization. Calculations were made for the years 1925, 1950, 1975, and 2000 as they represent a reasonable sample of the 1917-2019 study interval.

Fertility proportions were used to facilitate comparisons and to focus on the pattern over age. The desired normal curve is then fully specified by the mean and variance (or standard deviation) of the year's fertility (shown in Table 3 and Appendix Table 1). For each year, that mean and standard deviation were transformed into z-scores by the usual relationship

$$z = (X - \mu) / \text{SD} \tag{A.21}$$

where SD indicates the standard deviation ( $\text{Var}^{1/2}$ ) and X the age group boundary. Here, the age groupings were under 20, 20-24, 25-29, 30-34, 35-39, and 40+. Using a table of areas under the normal curve (see Bohrnstedt and Knoke 1982, Appx C), differences between areas set off by the z-scores were used to determine the age-specific fertility proportions. Graphs of the observed and estimated age-specific fertility rates for the 4 years are shown in Figure 4.

J. Appendix Supplements: Maple programs and Excel worksheet of calculations

- Supplement 1. Maple program HyperTrans PCasbrFig1. Calculations for Figure 1.  
Supplement 2. Maple program HyperTrans CubicParams. Calculations for Table 2/Figure 2.  
Supplement 3. Maple program HyperTrans cubicb30. Calculations for  $b_{20}$  and  $b_{30}$ .  
Supplement 4. Maple program HyperTrans b30Years1989-2019. Calculations for Table 4.  
Supplement 5. Excel Worksheet HyperTrans US1917-2019 P/C TFRs #2. Calculations for Appendix Tables 1 and 2 and Table 3; values for Figure 3.  
Supplement 6. Maple program HyperTrans b30Years1917-1947. Calculations for Table 5.

**Appendix References**

- Bohrnstedt, G.W. and D. Knoke. 1982. *Statistics for social data analysis*. Itasca IL: Peacock.
- Hamilton, B.E. and C.M. Cosgrove. 2010. Central birth rates, by live-birth order, current age, and race of women in each cohort from 1911 through 1991: United States, 1960-2005. Table 1. Hyattsville MD: National Center for Health Statistics.
- Hamilton, B.E. and S.E. Kirmeyer. 2017. Trends and Variations in Reproduction and Intrinsic Rates: United States, 1990-2014. National Vital Statistics Reports Vol 66, No 2. Hyattsville MD: National Center for Health Statistics.
- Hamilton, B.E., J.A. Martin, and M.J.K Osterman. 2020. Births: Provisional Data for 2019. Vital Statistics Rapid Release No 8. Hyattsville MD: National Center for Health Statistics.
- Heuser, R.L. 1976. *Fertility Tables for Birth Cohorts by Color: United States 1917-1973*. DHEW Pub. No. (HRA) 76-1152. Rockville, MD. U.S. National Center for Health Statistics.
- Hobcraft, J., J. Menken, and S. Preston. 1982. Age, period, and cohort effects in Demography: A review. *Population Index* 48: 4-43.
- Hoem, J.M. and P. Linnemann. 1988. The tails in moving average graduation. *Scandinavian Actuarial Journal* 4: 193-229.
- Kendall, M.G. and A. Stuart. 1958. *The advanced theory of statistics*. Vol 1. London: Hafner.
- Keyfitz, N. 1977. *Introduction to the mathematics of population*. 2d Ed. Reading MA: Addison-Wesley.
- Keyfitz, N. and W. Flieger. 1968. *World Population: An Analysis of Vital Data*. Chicago: Univ of Chicago Press.
- Keyfitz, N. and W. Flieger. 1990. *World Population Growth and Aging*. Chicago: Univ of Chicago Press.
- Martin, J.A., B.E. Hamilton, M.J.K. Osterman, and A.K. Driscoll. 2019. Births: Final Data for 2018. National Vital Statistics Reports Vol 68, No 13. Hyattsville MD: National Center for Health Statistics.
- Martin, J.A., B.E. Hamilton, M.J.K. Osterman, A.K. Driscoll, and T.J. Matthews. 2017. Births: Final Data for 2015. National Vital Statistics Reports Vol 66, No 1. Hyattsville MD: National Center for Health Statistics.

Appendix Table 1. Fertility Measures for the United States, 1927-2009, and Differences Between Observed and Estimated Cohort Total Fertility Rates

| Year | Var   | $b_{20}$ | $b_{30}$ | gTFR  | <u>Difference between observed CFR and</u> |              |               |               |
|------|-------|----------|----------|-------|--------------------------------------------|--------------|---------------|---------------|
|      |       |          |          |       | $TFR+b_{20}$                               | $TFR+b_{30}$ | $gTFR+b_{20}$ | $gTFR+b_{30}$ |
| 1927 | 46.10 | .00052   |          | 2.788 | -.213                                      |              | -.177         |               |
| 1928 | 45.70 | .00174   |          | 2.691 | -.157                                      |              | -.187         |               |
| 1929 | 45.30 | -.00076  |          | 2.592 | .028                                       |              | -.032         |               |
| 1930 | 45.30 | .00195   |          | 2.494 | -.144                                      |              | -.105         |               |
| 1931 | 45.30 | .00408   |          | 2.407 | -.144                                      |              | -.150         |               |
| 1932 | 44.89 | .00444   | .00379   | 2.327 | -.113                                      | -.084        | -.122         | -.093         |
| 1933 | 44.49 | .00573   | .00364   | 2.257 | -.069                                      | .024         | -.153         | -.060         |
| 1934 | 44.08 | .00608   | .00350   | 2.209 | -.182                                      | -.068        | -.159         | -.046         |
| 1935 | 44.08 | .00448   | .00382   | 2.187 | -.092                                      | -.063        | -.090         | -.062         |
| 1936 | 44.08 | .00684   | .00448   | 2.177 | -.175                                      | -.072        | -.207         | -.103         |
| 1937 | 42.90 | .00755   | .00381   | 2.175 | -.224                                      | -.063        | -.226         | -.065         |
| 1938 | 41.72 | .00582   | .00410   | 2.193 | -.220                                      | -.148        | -.191         | -.119         |
| 1939 | 40.54 | .00561   | .00464   | 2.230 | -.095                                      | -.056        | -.154         | -.114         |
| 1940 | 40.54 | .00633   | .00475   | 2.286 | -.143                                      | -.079        | -.200         | -.136         |
| 1941 | 40.54 | .00398   | .00376   | 2.357 | -.105                                      | -.096        | -.131         | -.122         |
| 1942 | 40.09 | .00167   | .00288   | 2.436 | -.188                                      | -.236        | -.069         | -.117         |
| 1943 | 39.64 | .00182   | .00260   | 2.521 | -.245                                      | -.276        | -.126         | -.157         |
| 1944 | 39.19 | .00324   | .00241   | 2.608 | -.132                                      | -.099        | -.246         | -.213         |
| 1945 | 39.19 | .00287   | .00220   | 2.701 | -.022                                      | .004         | -.301         | -.275         |
| 1946 | 39.19 | .00146   | .00109   | 2.793 | -.321                                      | -.307        | -.256         | -.241         |
| 1947 | 38.57 | .00010   | -.00025  | 2.882 | -.483                                      | -.469        | -.183         | -.170         |
| 1948 | 37.95 | -.00093  | -.00130  | 2.972 | -.226                                      | -.212        | -.172         | -.158         |
| 1949 | 37.34 | -.00097  | -.00138  | 3.061 | -.206                                      | -.191        | -.231         | -.215         |
| 1950 | 37.34 | -.00057  | -.00212  | 3.147 | -.160                                      | -.102        | -.279         | -.220         |
| 1951 | 37.34 | -.00378  | -.00412  | 3.231 | -.119                                      | -.106        | -.150         | -.137         |
| 1952 | 36.82 | -.00590  | -.00541  | 3.315 | -.166                                      | -.184        | -.194         | -.212         |
| 1953 | 36.55 | -.00478  | -.00501  | 3.397 | -.204                                      | -.196        | -.252         | -.244         |
| 1954 | 36.03 | -.00673  | -.00520  | 3.469 | -.213                                      | -.268        | -.221         | -.276         |
| 1955 | 36.03 | -.00887  | -.00493  | 3.528 | -.138                                      | -.280        | -.167         | -.309         |
| 1956 | 36.03 | -.00823  | -.00547  | 3.575 | -.225                                      | -.324        | -.195         | -.294         |
| 1957 | 35.46 | -.00669  | -.00540  | 3.614 | -.321                                      | -.367        | -.252         | -.298         |
| 1958 | 35.18 | -.00793  | -.00536  | 3.631 | -.194                                      | -.284        | -.195         | -.286         |
| 1959 | 34.62 | -.00782  | -.00576  | 3.610 | -.192                                      | -.264        | -.164         | -.235         |



Appendix Table 1. Fertility Measures for the United States, 1927-2009, and Differences Between Observed and Estimated Cohort Total Fertility Rates (con't)

| Year | Var   | <u>b<sub>20</sub></u> | <u>b<sub>30</sub></u> | gTFR  | Difference between observed CFR and |                           |                            |                            |
|------|-------|-----------------------|-----------------------|-------|-------------------------------------|---------------------------|----------------------------|----------------------------|
|      |       |                       |                       |       | <u>TFR+b<sub>20</sub></u>           | <u>TFR+b<sub>30</sub></u> | <u>gTFR+b<sub>20</sub></u> | <u>gTFR+b<sub>30</sub></u> |
| 1960 | 34.62 | -.00613               | -.00554               | 3.553 | -.209                               | -.230                     | .157                       | -.178                      |
| 1961 | 34.62 | -.00554               | -.00420               | 3.468 | -.191                               | -.237                     | -.095                      | -.141                      |
| 1962 | 34.26 | -.00619               | -.00309               | 3.364 | -.057                               | -.163                     | .003                       | -.103                      |
| 1963 | 34.23 | -.00565               | -.00318               | 3.244 | -.001                               | -.085                     | .053                       | -.031                      |
| 1964 | 34.39 | -.00510               | -.00304               | 3.108 | .040                                | -.031                     | .103                       | .032                       |
| 1965 | 35.12 | -.00530               | -.00292               | 2.964 | .267                                | .183                      | .184                       | .101                       |
| 1966 | 35.02 | -.00311               | -.00200               | 2.813 | .323                                | .284                      | .180                       | .141                       |
| 1967 | 34.90 | .00037                | -.00076               | 2.661 | .207                                | .246                      | .071                       | .110                       |
| 1968 | 34.80 | .00152                | .00003                | 2.514 | .151                                | .205                      | .069                       | .123                       |
| 1969 | 34.70 | .00294                | .00066                | 2.372 | -.005                               | .074                      | .046                       | .125                       |
| 1970 | 34.60 | .00546                | .00179                | 2.242 | -.199                               | -.072                     | -.009                      | .118                       |
| 1971 | 34.39 | .00645                | .00258                | 2.129 | -.135                               | -.002                     | -.019                      | .114                       |
| 1972 | 34.18 | .00624                | .00310                | 2.033 | .057                                | .164                      | .017                       | .125                       |
| 1973 | 33.97 | .00604                | .00343                | 1.954 | .128                                | .216                      | .036                       | .125                       |
| 1974 | 33.76 | .00498                | .00355                | 1.892 | .135                                | .182                      | .078                       | .126                       |
| 1975 | 33.55 | .00303                | .00354                | 1.843 | .239                                | .222                      | .141                       | .124                       |
| 1976 | 33.40 | .00300                | .00392                | 1.803 | .210                                | .179                      | .145                       | .114                       |
| 1977 | 33.24 | .00384                | .00412                | 1.775 | .100                                | .091                      | .115                       | .105                       |
| 1978 | 33.09 | .00469                | .00414                | 1.759 | .078                                | .097                      | .080                       | .098                       |
| 1979 | 32.93 | .00530                | .00383                | 1.754 | -.003                               | .046                      | .051                       | .099                       |
| 1980 | 32.78 | .00616                | .00318                | 1.762 | -.064                               | .034                      | .014                       | .112                       |
| 1981 | 33.10 | .00488                | .00268                | 1.779 | .008                                | .081                      | .042                       | .115                       |
| 1982 | 33.42 | .00252                | .00209                | 1.798 | .074                                | .089                      | .103                       | .118                       |
| 1983 | 33.74 | .00125                | .00184                | 1.819 | .147                                | .127                      | .127                       | .107                       |
| 1984 | 34.06 | .00010                | .00152                | 1.842 | .183                                | .134                      | .147                       | .099                       |
| 1985 | 34.38 | -.00132               | .00142                | 1.868 | .205                                | .111                      | .181                       | .087                       |
| 1986 | 34.54 | -.00107               | .00100                | 1.894 | .209                                | .137                      | .152                       | .081                       |
| 1987 | 34.70 | -.00075               | .00035                | 1.920 | .174                                | .135                      | .125                       | .087                       |
| 1988 | 34.87 | -.00040               | .00023                | 1.946 | .107                                | .085                      | .095                       | .073                       |
| 1989 | 35.03 | .00005                | .00020                | 1.969 | .020                                | .015                      | .065                       | .060                       |
| 1990 | 35.19 | .00049                | -.00005               | 1.988 | -.051                               | -.031                     | .042                       | .061                       |
| 1991 | 35.61 | .00019                | .00008                | 2.004 | -.009                               | -.005                     | .050                       | .054                       |
| 1992 | 36.03 | .00003                | .00017                | 2.014 | .031                                | .026                      | .062                       | .058                       |

Appendix Table 1. Fertility Measures for the United States, 1927-2009, and Differences Between Observed and Estimated Cohort Total Fertility Rates (con't)

| Year | Var   | $b_{20}$ | $b_{30}$ | gTFR  | Difference between observed CFR and |               |                |                |
|------|-------|----------|----------|-------|-------------------------------------|---------------|----------------|----------------|
|      |       |          |          |       | TFR+ $b_{20}$                       | TFR+ $b_{30}$ | gTFR+ $b_{20}$ | gTFR+ $b_{30}$ |
| 1993 | 36.46 | -.00058  | -.00025  | 2.020 | .102                                | .090          | .101           | .090           |
| 1994 | 36.88 | -.00109  | -.00053  | 2.020 | .150                                | .129          | .131           | .110           |
| 1995 | 37.30 | -.00157  | -.00092  | 2.017 | .206                                | .181          | .167           | .142           |
| 1996 | 37.28 | -.00098  | -.00097  | 2.012 | .187                                | .187          | .151           | .151           |
| 1997 | 37.27 | -.00050  | -.00090  | 2.006 | .179                                | .194          | .144           | .159           |
| 1998 | 37.23 | -.00041  | -.00103  | 2.004 | .184                                | .207          | .179           | .202           |
| 1999 | 37.21 | -.00025  | -.00096  | 2.008 | .208                                | .235          | .208           | .234           |
| 2000 | 37.18 | -.00015  | -.00087  | 2.020 | .166                                | .192          | .202           | .228           |
| 2001 | 37.16 | -.00085  | -.00107  | 2.035 | .230                                | .238          | .225           | .233           |
| 2002 | 37.14 | -.00110  | -.00113  | 2.050 | .253                                | .243          | .224           | .225           |
| 2003 | 37.13 | -.00129  | -.00102  | 2.061 | .218                                | .207          | .204           | .194           |
| 2004 | 37.40 | -.00097  | -.00073  | 2.066 | .225                                | .216          | .210           | .201           |
| 2005 | 37.50 | -.00110  |          | 2.065 | .224                                |               | .216           |                |
| 2006 | 37.68 | -.00086  |          | 2.056 | .167                                |               | .218           |                |
| 2007 | 37.75 | -.00110  |          | 2.043 | .142                                |               | .220           |                |
| 2008 | 38.06 | -.00118  |          | 2.024 | .156                                |               | .204           |                |
| 2009 | 38.14 | -.00134  |          | 2.001 | .203                                |               | .204           |                |

**SOURCES:** See text, Appendix Sections F and G, and Appendix Supplement 5. Fertility variances (Var) for years through 1985 taken or calculated from Keyfitz and Flieger (1968, 1990) or published rates.

**NOTES:** See text. Symbols  $b_{20}$  and  $b_{30}$  are coefficients of the quadratic term in cubic curves fit to TFR values spanning 20 and 30 years, respectively. The symbol gTFR indicates a Total Fertility Rate smoothed by a 21-term weighted moving average.

Appendix Table 2. Assessing the Accuracy of Alternative Estimates of United States Total Fertility Assuming Constant Age-Specific Fertility Proportions and Cubically Varying Period Fertility Levels, 1917-2019

| <u>Method</u>                            | <u>Years Estimated</u> | <u>Average Error</u> | <u>Number of Errors &gt; 0.2</u> | <u>Number of Errors &gt; 0.3</u> | <u>Number of Errors &gt; 0.4</u> |
|------------------------------------------|------------------------|----------------------|----------------------------------|----------------------------------|----------------------------------|
| Observed – TFR(t)                        | 1917-2013<br>(97)      | .196                 | 39                               | 17                               | 8                                |
| Observed – (TFR(t)+b <sub>20</sub> Var)  | 1927-2009<br>(83)      | .157                 | 29                               | 4                                | 1                                |
| Observed – (TFR(t)+b <sub>30</sub> Var)  | 1932-2004<br>(73)      | .154                 | 23                               | 4                                | 1                                |
| Observed – (gTFR(t)+b <sub>20</sub> Var) | 1927-2009<br>(83)      | .144                 | 22                               | 1                                | 0                                |
| Observed – (gTFR(t)+b <sub>30</sub> Var) | 1932-2004<br>(73)      | .145                 | 18                               | 1                                | 0                                |

NOTES: See discussion in text and Appendix Section G. The Observed value is always CFR(T). The Average Error is the sum of the magnitudes (absolute values) of the errors for each year divided by the number of years observed. The symbol b<sub>20</sub> denotes the coefficient of the quadratic term in the cubic curve fitted to years -10, -5, +5, and +10 around each focal year, which was taken to be year 0. The symbol b<sub>30</sub> denotes the coefficient of the quadratic term in the cubic curve fitted to years -15, -5, +5, and +15 around each focal year 0. The symbol gTFR represents the TFR series graduated by a 21-term moving average around each year.
